# Supplementary material for: Artemisinin-Resistant Plasmodium falciparum with High Survival Rates, Uganda, 2014–2016
Source: PubMed Central journal article supplement (PMC5875287; doi:10.3201/eid2404.170141), 2018-04
Supplement: 17-0141-Techapp-s1.pdf [file 17-0141-Techapp-s1.pdf]

# Artemisinin-Resistant *Plasmodium falciparum* with High Survival Rates, Uganda, 2014–2016

## Technical Appendix

### Detection of artemisinin-resistant *Plasmodium falciparum* isolates using ex-vivo ring-stage survival assay in Uganda

**Technical Appendix Table 1.** *Plasmodium falciparum* isolates used for PCA and STRUCTURE analysis

| ID* | Mutation in <i>PfKelch13</i> | Country    | Region | Read Archive ID <sup>†</sup> |
|-----|------------------------------|------------|--------|------------------------------|
| H2  | WT                           | Uganda     | Africa | DRA005347                    |
| H3  | WT                           | Uganda     | Africa | DRA005346                    |
| H4  | A675V                        | Uganda     | Africa | DRA005348                    |
| 1   | WT                           | Cameroon   | Africa | ERS418899                    |
| 2   | WT                           | D.R.Congo  | Africa | ERS347631                    |
| 3   | WT                           | Gambia     | Africa | ERS157495                    |
| 4   | WT                           | Ghana      | Africa | ERS010122                    |
| 5   | WT                           | Guinea     | Africa | ERS041976                    |
| 6   | WT                           | Kenya      | Africa | ERS087025                    |
| 7   | WT                           | Madagascar | Africa | ERS404077                    |
| 8   | WT                           | Malawi     | Africa | ERS032647                    |
| 9   | WT                           | Mali       | Africa | ERS010184                    |
| 10  | WT                           | Nigeria    | Africa | ERS347697                    |
| 11  | WT                           | Uganda     | Africa | ERS045919                    |
| 12  | WT                           | Tanzania   | Africa | ERS013057                    |
| 13  | Y493H                        | Cambodia   | Asia   | ERS028717                    |
| 14  | C580Y                        | Cambodia   | Asia   | ERS023736                    |
| 15  | P574L                        | Thailand   | Asia   | ERS142852                    |
| 16  | A675V                        | Thailand   | Asia   | ERS142845                    |
| 17  | P441L                        | Myanmar    | Asia   | ERS143489                    |
| 18  | F673I                        | Myanmar    | Asia   | ERS086879                    |
| 19  | WT                           | Bangladesh | Asia   | ERS010785                    |
| 20  | WT                           | Bangladesh | Asia   | ERS174561                    |
| 21  | WT                           | Cambodia   | Asia   | ERS032109                    |
| 22  | WT                           | Cambodia   | Asia   | ERS050881                    |
| 23  | WT                           | Cambodia   | Asia   | ERS338591                    |
| 24  | WT                           | Laos       | Asia   | ERS086919                    |
| 25  | WT                           | Laos       | Asia   | ERS174612                    |
| 26  | WT                           | Myanmar    | Asia   | ERS347690                    |
| 27  | WT                           | Myanmar    | Asia   | ERS086951                    |
| 28  | WT                           | Thailand   | Asia   | ERS142855                    |
| 29  | WT                           | Thailand   | Asia   | ERS347665                    |
| 30  | WT                           | Vietnam    | Asia   | ERS087028                    |
| 31  | WT                           | Vietnam    | Asia   | ERS174549                    |

\*H2, H3 and H4 are categorized as high-RSA survival (survival rate  $\geq 10\%$ ).

<sup>†</sup>Read data are registered on Sequence Read Archive at National Center for Biotechnology Information (<https://www.ncbi.nlm.nih.gov/sra>)

**Technical Appendix Table 2.** Background information of *Plasmodium falciparum* isolates in Uganda according to RSA results\*

| Characteristics   | Parasite phenotype grouping based on ex-vivo RSA (survival rate) |                                             |                         |
|-------------------|------------------------------------------------------------------|---------------------------------------------|-------------------------|
|                   | High-RSA survival<br>(≥10%)                                      | Intermediate-RSA survival<br>(>0% but <10%) | No-RSA survival<br>(0%) |
| Patients (n)      |                                                                  |                                             |                         |
| 2014 Oct          | 1                                                                | 3                                           | 11                      |
| 2015 May          | 2                                                                | 6                                           | 35                      |
| 2015 Oct          | 0                                                                | 6                                           | 45                      |
| 2016 June         | 1                                                                | 22                                          | 62                      |
| Gender (n)        |                                                                  |                                             |                         |
| Male              | 3                                                                | 18                                          | 71                      |
| Female            | 1                                                                | 19                                          | 82                      |
| Age (year)        |                                                                  |                                             |                         |
| Median (IQR*)     | 3.1 (2.0–4.5)                                                    | 2.4 (1.7–4.0)                               | 3.0 (2.0–4.4)           |
| Fever (≥37.5°C)   |                                                                  |                                             |                         |
| Number (%)        | 4 (100)                                                          | 35 (95)                                     | 140 (92)                |
| Median (IQR*)     | 38.9 (38.7–39.0)                                                 | 39.5 (38.7–39.6)                            | 39.0 (38–39.5)          |
| Symptoms (n)      |                                                                  |                                             |                         |
| Cough             | 33                                                               | 29                                          | 29                      |
| Headache          | 33                                                               | 19                                          | 19                      |
| Vomiting          | 0                                                                | 25                                          | 25                      |
| Abdominal pain    | 0                                                                | 21                                          | 21                      |
| Diarrhea          | 0                                                                | 10                                          | 10                      |
| Convulsion        | 0                                                                | 8                                           | 8                       |
| Day 0 parasitemia |                                                                  |                                             |                         |
| Median (IQR)      | 1.79% (0.83%–5.63%)                                              | 1.92% (1.11%–3.20%)                         | 1.96% (0.80%–4.0%)      |

\*IQR: Interquartile range

**Technical Appendix Table 3.** Proportion of early ring-stage parasites at enrollment

| Sample ID | Proportion of early ring-stage<br>parasite (%)* | Survival rate (%)† | Sampling period |
|-----------|-------------------------------------------------|--------------------|-----------------|
| H1        | 80.4                                            | 34.3               | 2014, Oct       |
| H2        | 98.2                                            | 13.3               | 2015, May       |
| H3        | 51.9                                            | 18.9               | 2015, May       |
| H4        | 72.0                                            | 18.1               | 2016, June      |
| I1        | 57.7                                            | 9.6                | 2015, Oct       |
| I2        | 92.3                                            | 8.7                | 2016, June      |
| I3        | 68.6                                            | 8.6                | 2016, June      |
| I4        | 98.0                                            | 8.5                | 2016, June      |
| I5        | 52.8                                            | 8.4                | 2015, Oct       |
| I6        | 100.0                                           | 8.2                | 2015, May       |
| I7        | 51.9                                            | 8.2                | 2016, June      |
| I8        | 100.0                                           | 8.0                | 2016, June      |
| I9        | 67.3                                            | 8.0                | 2016, June      |
| I10       | 92.0                                            | 7.6                | 2016, June      |
| I11       | 100.0                                           | 7.4                | 2015, Oct       |
| I12       | 58.5                                            | 7.2                | 2016, June      |
| I13       | 84.0                                            | 7.1                | 2016, June      |
| I14       | 100.0                                           | 6.2                | 2016, June      |
| I15       | 98.2                                            | 6.1                | 2016, June      |
| I16       | 100.0                                           | 5.9                | 2016, June      |
| I17       | 100.0                                           | 5.7                | 2016, June      |
| I18       | 100.0                                           | 4.7                | 2015, May       |
| I19       | 74.0                                            | 4.5                | 2016, June      |
| I20       | 100.0                                           | 4.3                | 2015, Oct       |
| I21       | 91.8                                            | 4.1                | 2016, June      |
| I22       | 31.5                                            | 3.6                | 2016, June      |
| I23       | 100.0                                           | 3.6                | 2015, May       |
| I24       | 94.6                                            | 3.4                | 2016, June      |
| I25       | 57.1                                            | 2.8                | 2016, June      |
| I26       | 95.7                                            | 2.5                | 2014, Oct       |
| I27       | 100.0                                           | 1.8                | 2015, May       |
| I28       | 96.0                                            | 1.8                | 2016, June      |
| I29       | 97.0                                            | 1.6                | 2016, June      |
| I30       | 100.0                                           | 1.6                | 2015, May       |
| I31       | 73.7                                            | 1.6                | 2016, June      |
| I32       | 90.0                                            | 1.3                | 2015, May       |
| I33       | 100.0                                           | 1.2                | 2015, May       |

| Sample ID | Proportion of early ring-stage parasite (%) <sup>*</sup> | Survival rate (%) <sup>†</sup> | Sampling period |
|-----------|----------------------------------------------------------|--------------------------------|-----------------|
| I34       | 100.0                                                    | 1.1                            | 2014, Oct       |
| I35       | 100.0                                                    | 1.0                            | 2016, June      |
| I36       | 100.0                                                    | 0.7                            | 2015, Oct       |
| I37       | 24.0                                                     | 0.2                            | 2015, Oct       |

<sup>\*</sup>Rate of early ring-stage parasite = number of early ring form / total number of parasite × 100.

<sup>†</sup>Survival rate = parasitemia at 700 nmol/L dihydroartemisinin exposed / parasitemia at 0 nmol/L control × 100.

**Technical Appendix Table 4.** Prevalence of *PfKelch13* mutation in samples where ex-vivo RSA was successfully performed

| Mutation in <i>PfKelch13</i> | Parasite phenotype based on ex-vivo RSA |                                             |                         |
|------------------------------|-----------------------------------------|---------------------------------------------|-------------------------|
|                              | High-RSA survival<br>(≥10%)             | Intermediate-RSA survival<br>(>0% but <10%) | No-RSA survival<br>(0%) |
| Wild type                    | 3                                       | 32                                          | 144                     |
| C469Y                        | 0                                       | 1                                           | 0                       |
| M472V                        | 0                                       | 0                                           | 1                       |
| A621S                        | 0                                       | 0                                           | 1                       |
| V666I                        | 0                                       | 0                                           | 1                       |
| A675V                        | 1                                       | 0                                           | 0                       |
| Unknown <sup>*</sup>         | 0                                       | 4                                           | 6                       |

<sup>\*</sup>No sequence data were obtained.

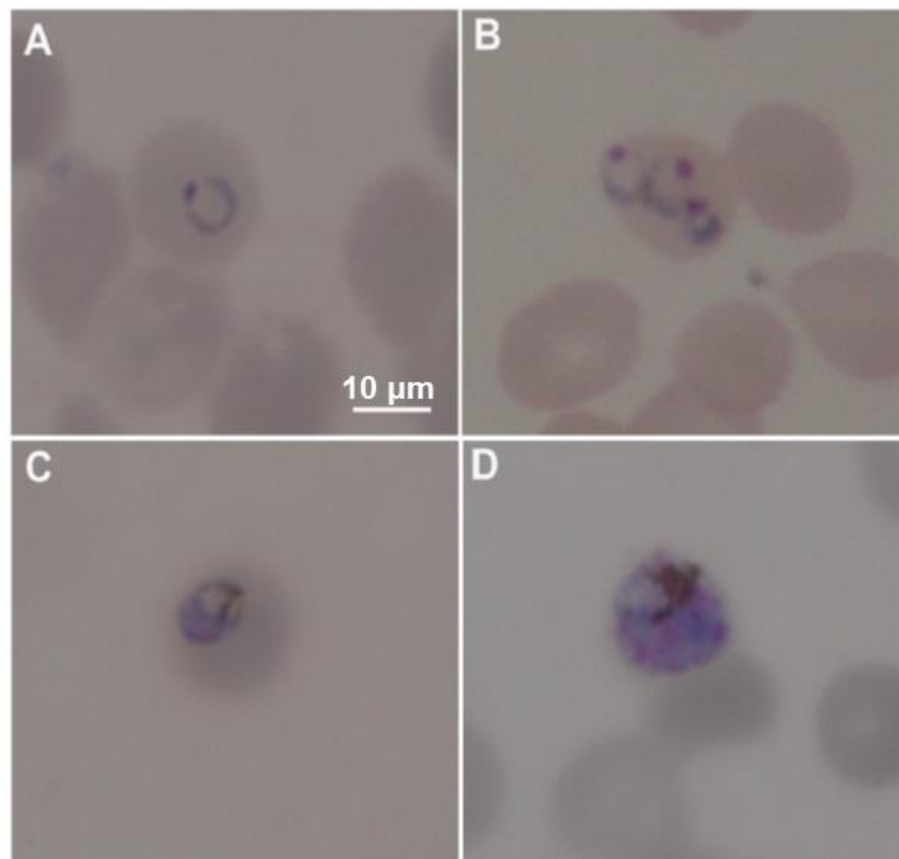

**Technical Appendix Figure.** Representative images of high-RSA survival isolates. Survived parasites developed into A) Late ring-form, B) Early trophozoite, C) Mid-trophozoite, or D) Schizont after 6 h dihydroartemisinin pulse at 700 nmol/L, followed by 66 h culture in drug-free medium. Photographs were obtained from Giemsa stained thin blood smears of H2 (A, B) and H3 (C, D) parasites.
